# Supplementary material
Source: Elsevier journal article supplement (https://www.sciencedirect.com/science/article/pii/S2387020621000498)
Supplement: mmc1 [file S2387020621000498:mmc1.docx]

**Anexo 1.**

**Encuesta.**

**ENCUESTA TRABAJO DE FINAL DE GRADO: EUTANASIA**

Profesión: Médico/a Enfermero/a Adjunto/a Residente/a

Servicio: ....................................................

Encuesta hecha con el objetivo de valorar el conocimiento de la eutanasia por parte de los profesionales sanitarios del Hospital del Mar. A continuación, se presentan 5 casos, de los cuales tendréis que señalar con círculo el caso o los casos que creáis correspondiente/s a la eutanasia. No hay límites de opciones, pudiendo escoger un caso, más de uno, todos o ninguno:

1. Paciente con distrofia muscular progresiva dependiente de ventilación mecánica. Pide ser sedada y desconectada del ventilador. Después de un gran debate, la paciente es desconectada habiendo sido sedada previamente.
2. Paciente oncológica ingresada desde hace dos meses en el hospital en estadio final de su vida debido a las complicaciones de la enfermedad. Hace 3 años hizo el documento de voluntades anticipadas donde determinaba que, cuando perdiera la consciencia y su final fuese inmediato, quería ser sedada para no sufrir y así evitar el dolor, la sensación de disnea, etc. El paciente es sedado para controlar estos síntomas y muere de una manera tranquila.
3. Paciente anciana con demencia que llega al hospital por una fractura de fémur. Durante su estancia, le detectan un coágulo en el cerebro que no se puede operar y la paciente entra en coma. No existe otra solución que la administración de sedantes para que no sufra físicamente y asegurar su máxima comodidad. A pesar del buen control de los síntomas, la familia, al ver que la paciente no fallece, piden al médico aumentar la sedación para provocarle la muerte. Se aumenta y la paciente muere.
4. Paciente tetrapléjico debido a una fractura cervical. Hace una petición para pedir a su médico la administración de unos fármacos para producirle la muerte, la cual es rechazada. Al cabo de unos años, el paciente muere después de ingerir unos fármacos con la finalidad de acabar con su vida, que le ha facilitado otra persona, por voluntad propia.
5. Ninguna de las anteriores es eutanasia.

El estudio sigue la Ley Orgánica 15/1999 del 13 de diciembre de “Protección de Datos de Carácter Personal”.
